# Supplementary material
Source: PubMed Central journal article supplement (PMC6217988)

# Human-Influenza Virus Protein-Protein Interactions

A549 Human Epithelial Cells

- Bait
- No IFN
- Plus IFN
- Both
- Exosome Complex Members
- Host Interactors of the Exosome

A

## H1N1 Influenza A Virus (California 2009)

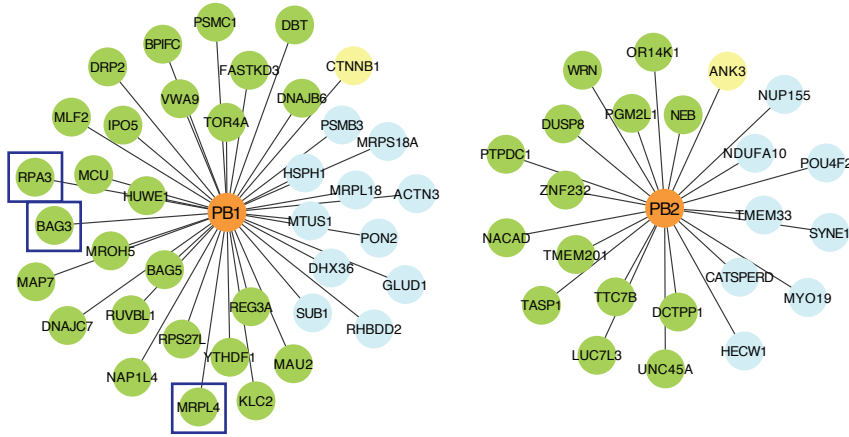

B

## H3N2 Influenza A Virus (Wyoming 2003)

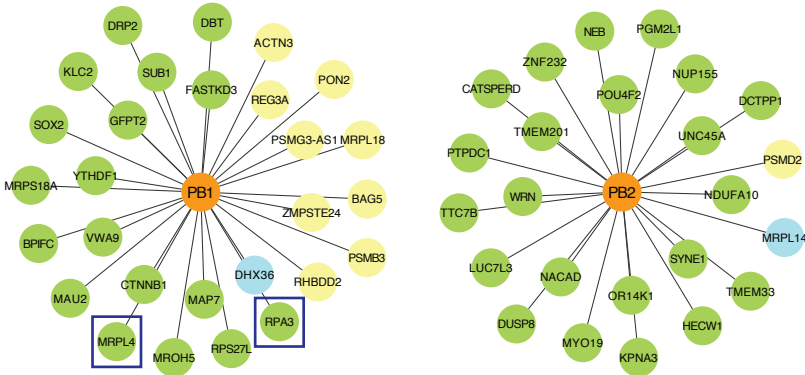

Supplement: NIHMS871396-supplement-1.pdf [file NIHMS871396-supplement-1.pdf]
