# Supplementary material
Source: PubMed Central journal article supplement (PMC6217988)
Supplement: NIHMS871396-supplement-5.pdf [file NIHMS871396-supplement-5.pdf]

A

BAIT - *in vitro*

PREY PROTEINS

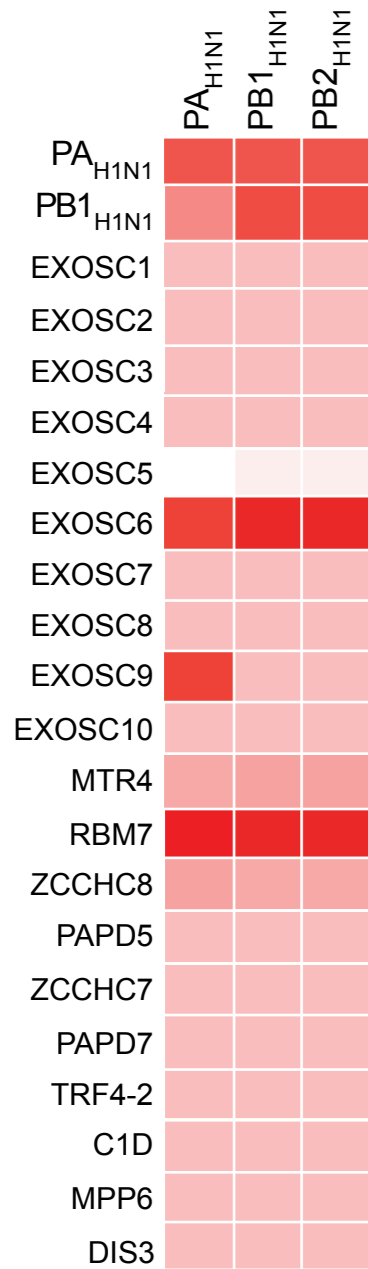

Log<sub>2</sub> Fold Change in Protein Abundance  
(normalized over untagged virus)

B

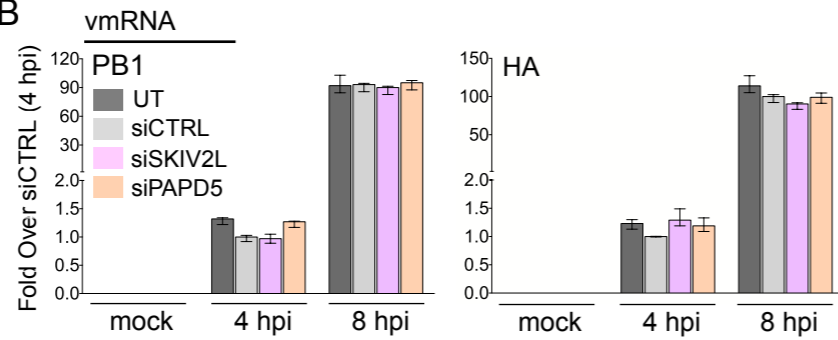

C

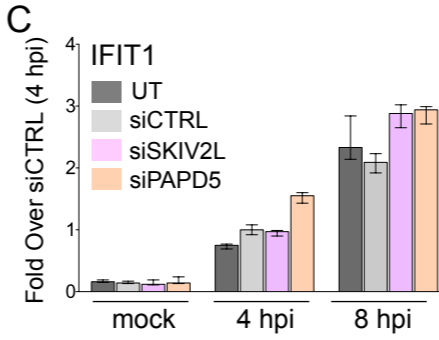

D

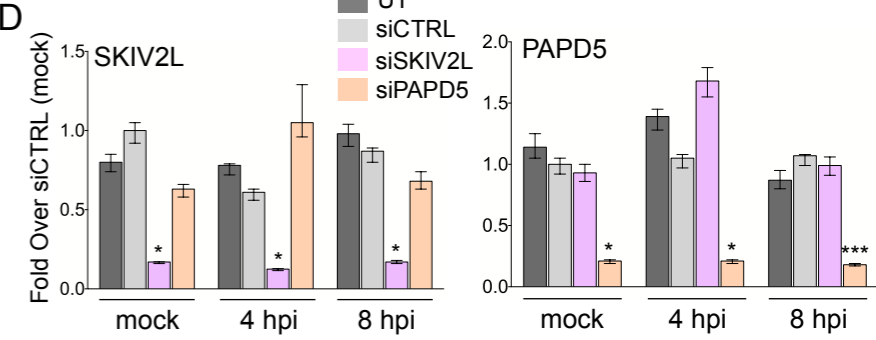

E

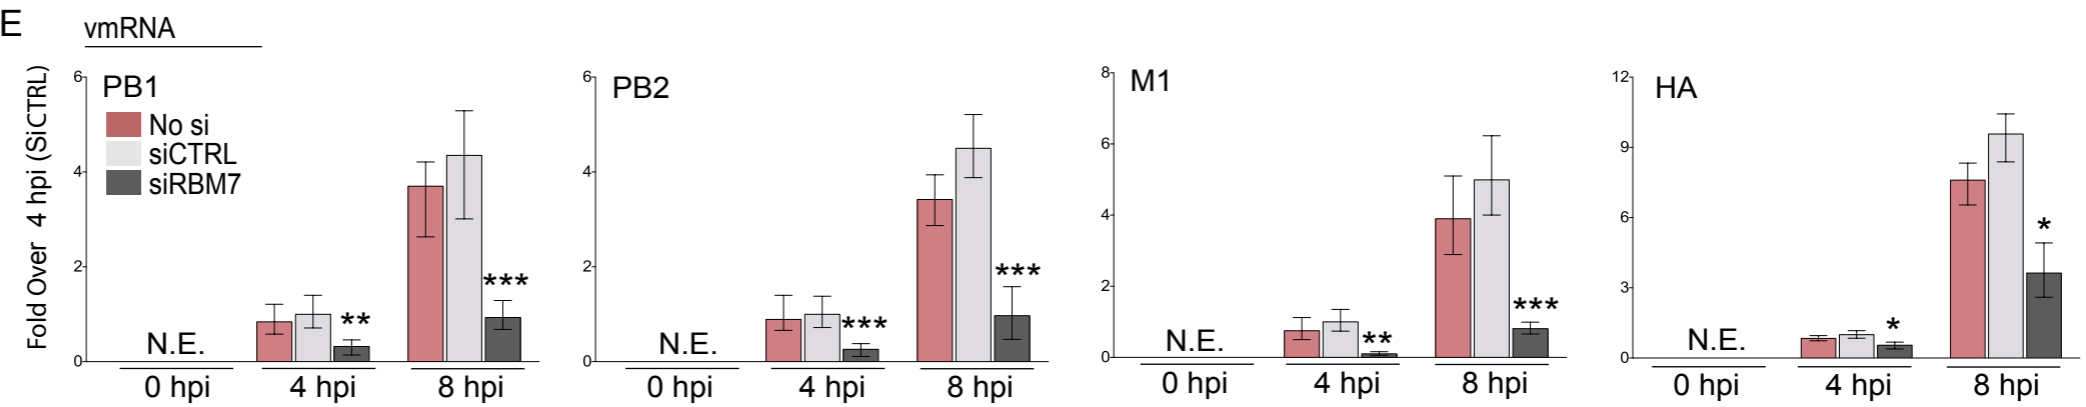

F

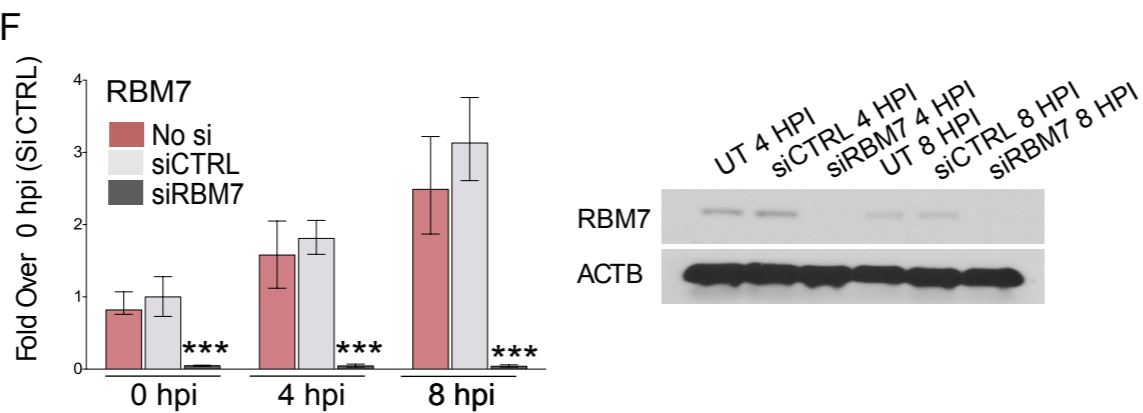

G

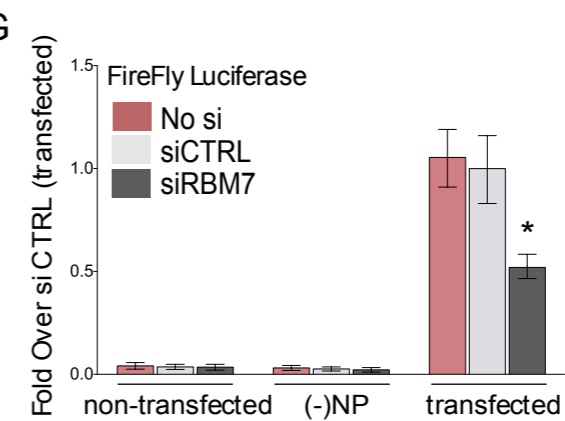

H

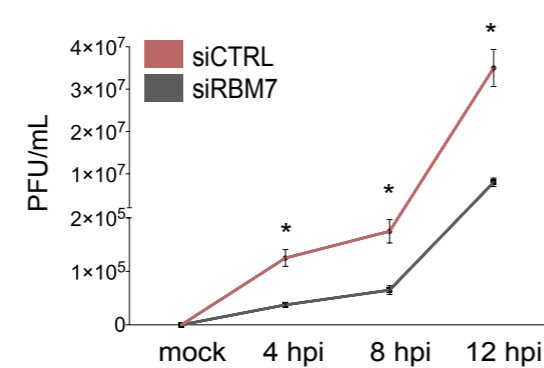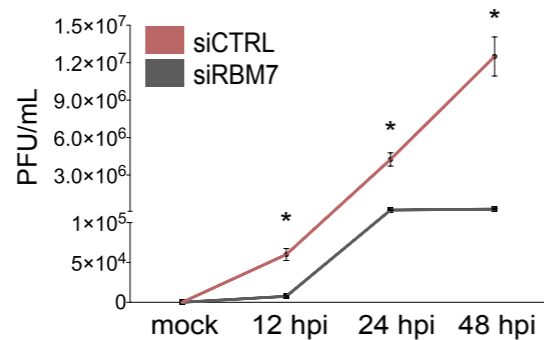

I

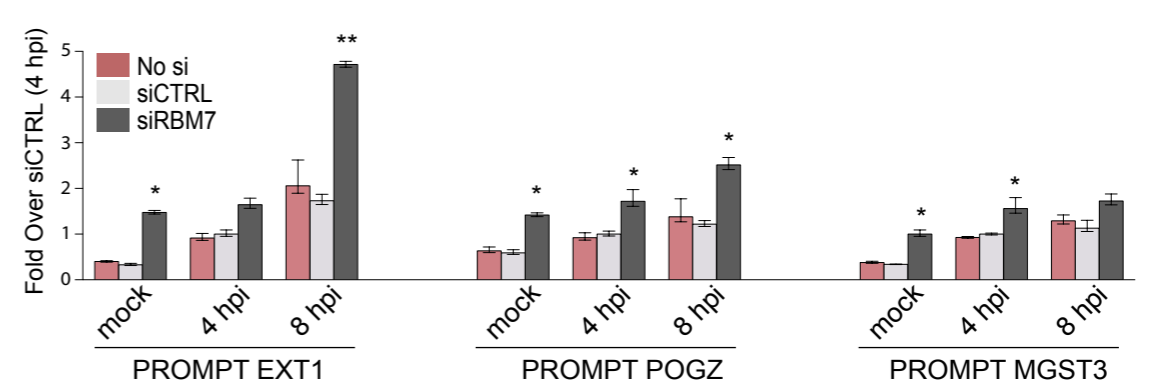

eRNA (+) ITPKB chr1: 226,888,896-226,893,578

eRNA (-) chr1: 32,407,369-32,413,235

eRNA (+) chr1: 32,407,369-32,413,235
