# Supplementary material
Source: PubMed Central journal article supplement (PMC6217988)

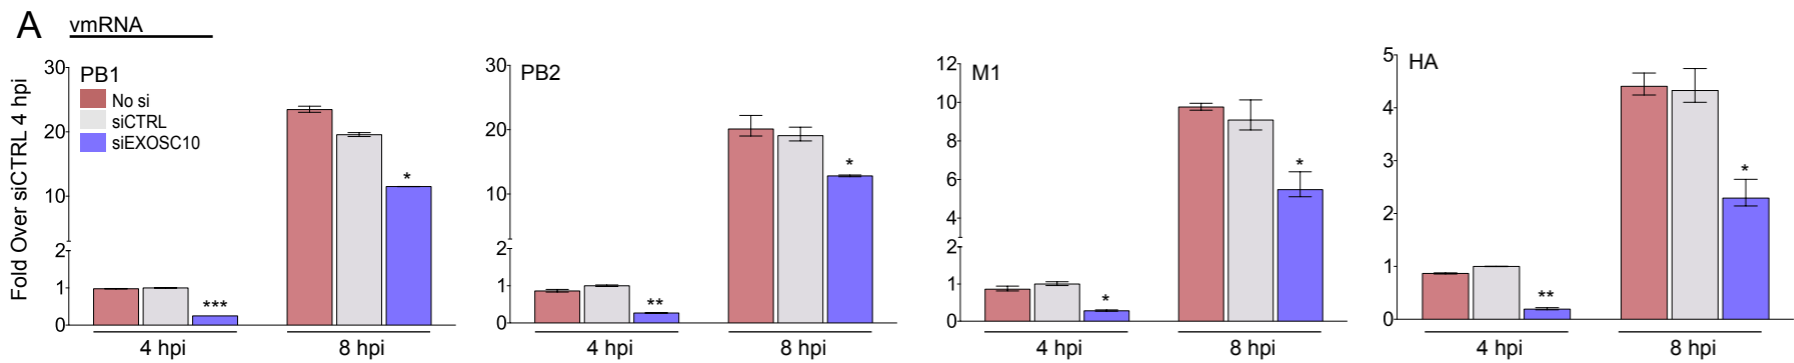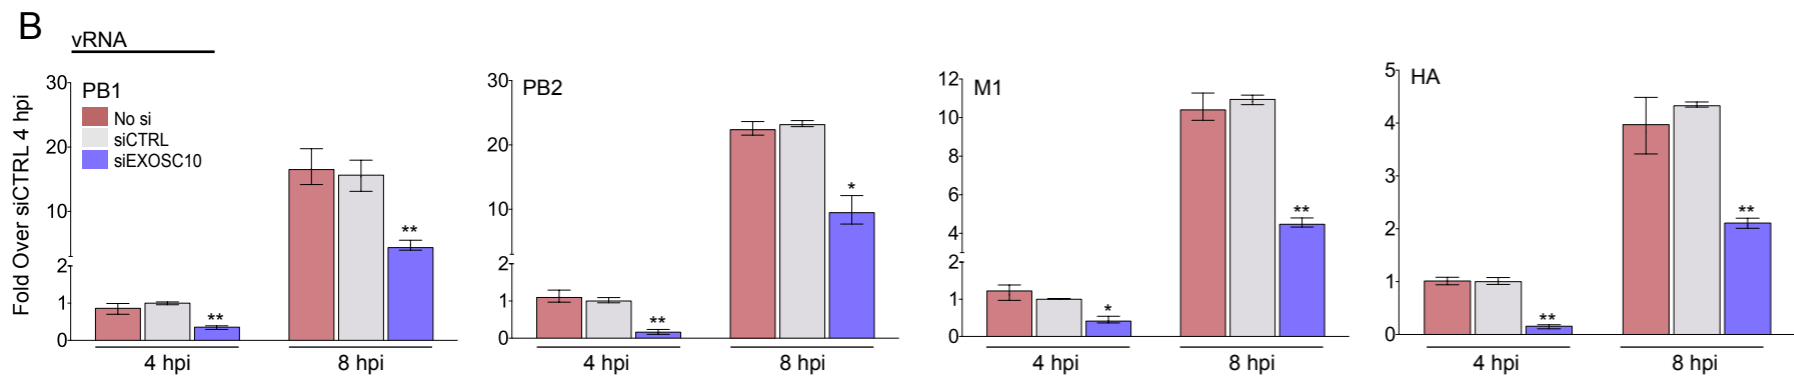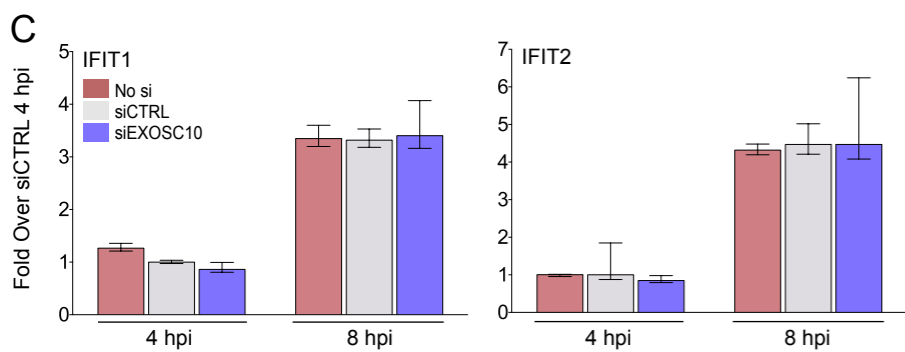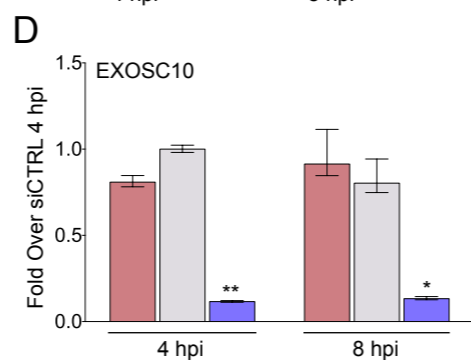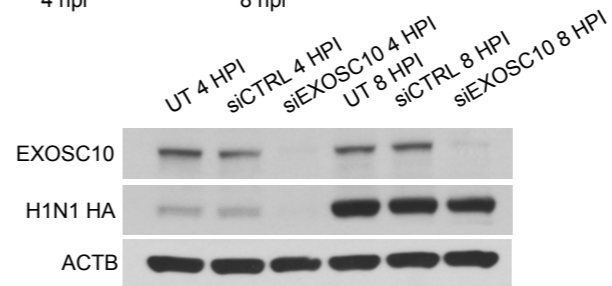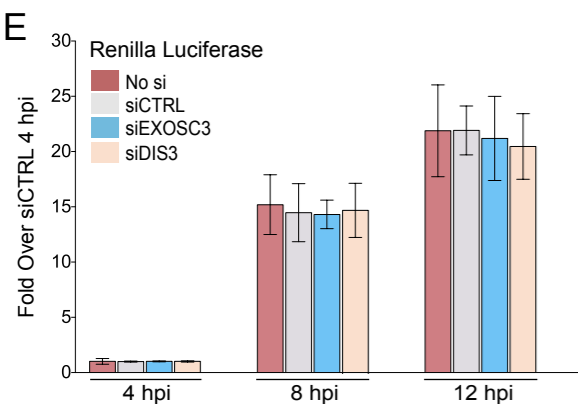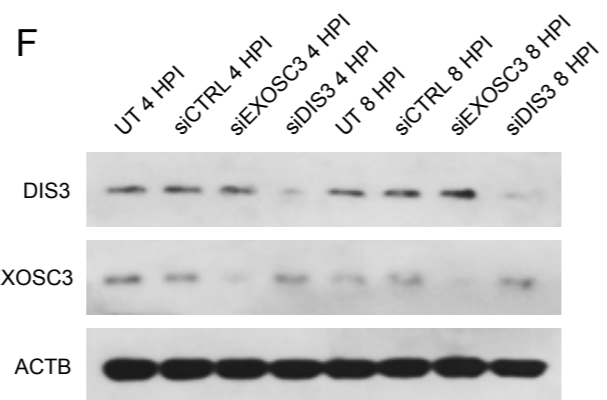

Supplement: NIHMS871396-supplement-2.pdf [file NIHMS871396-supplement-2.pdf]

A

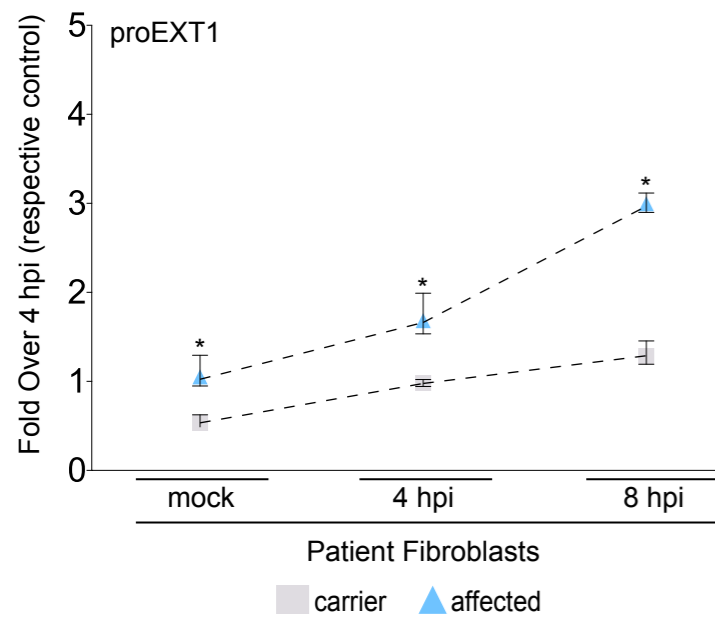

B

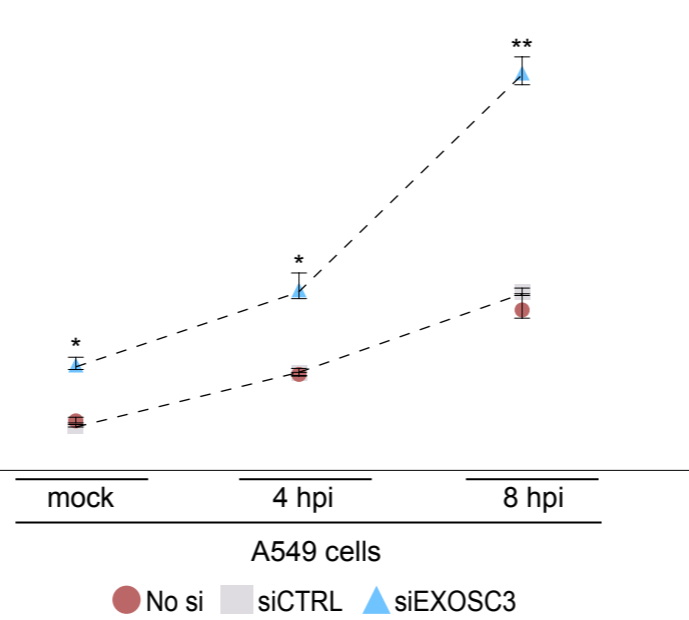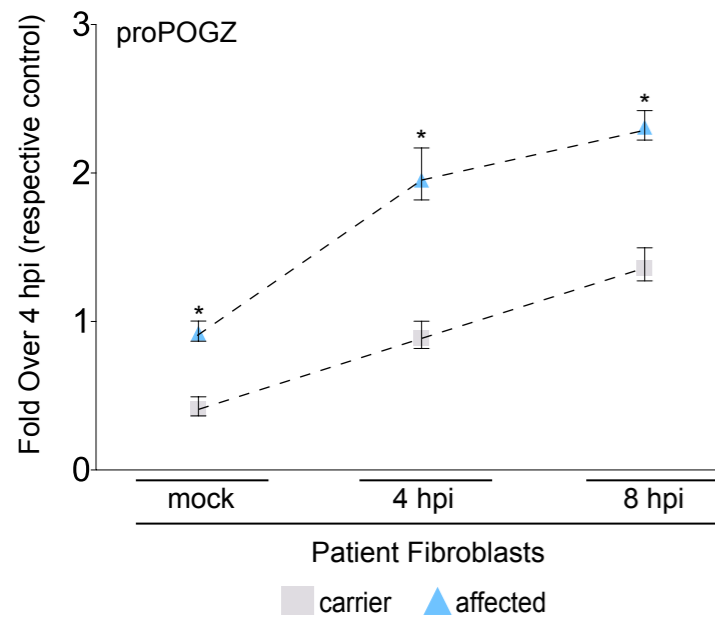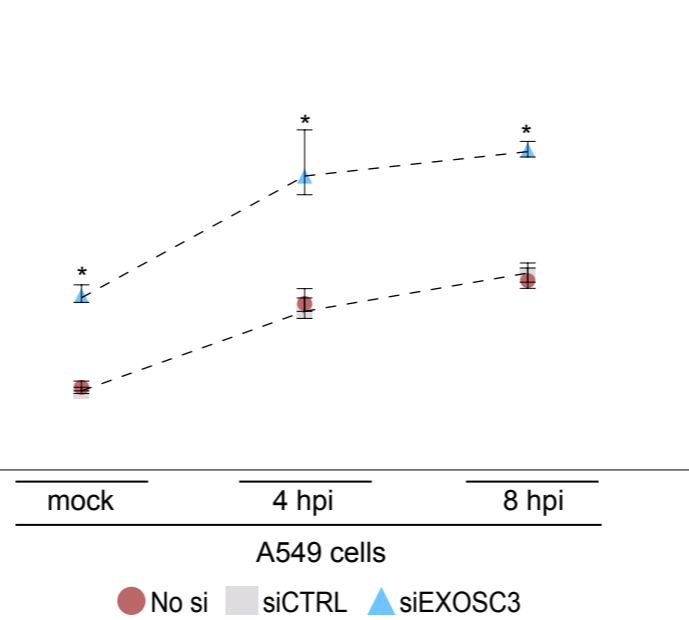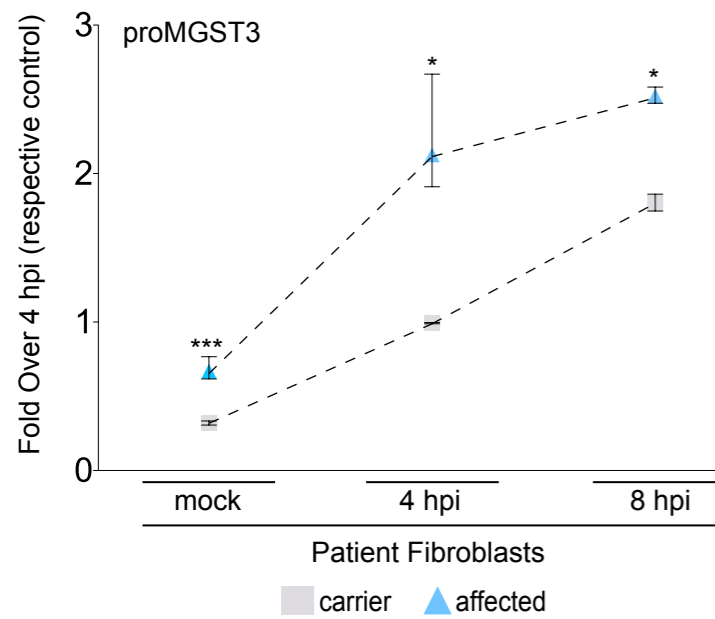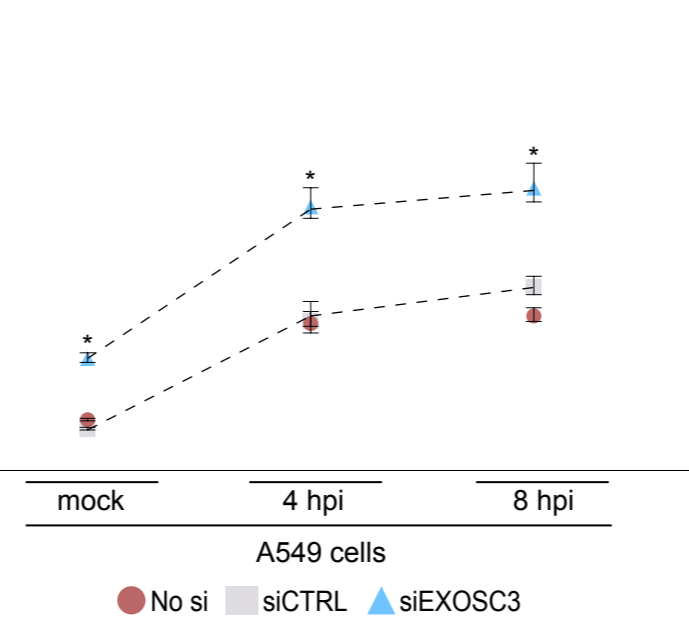

Supplement: NIHMS871396-supplement-3.pdf [file NIHMS871396-supplement-3.pdf]

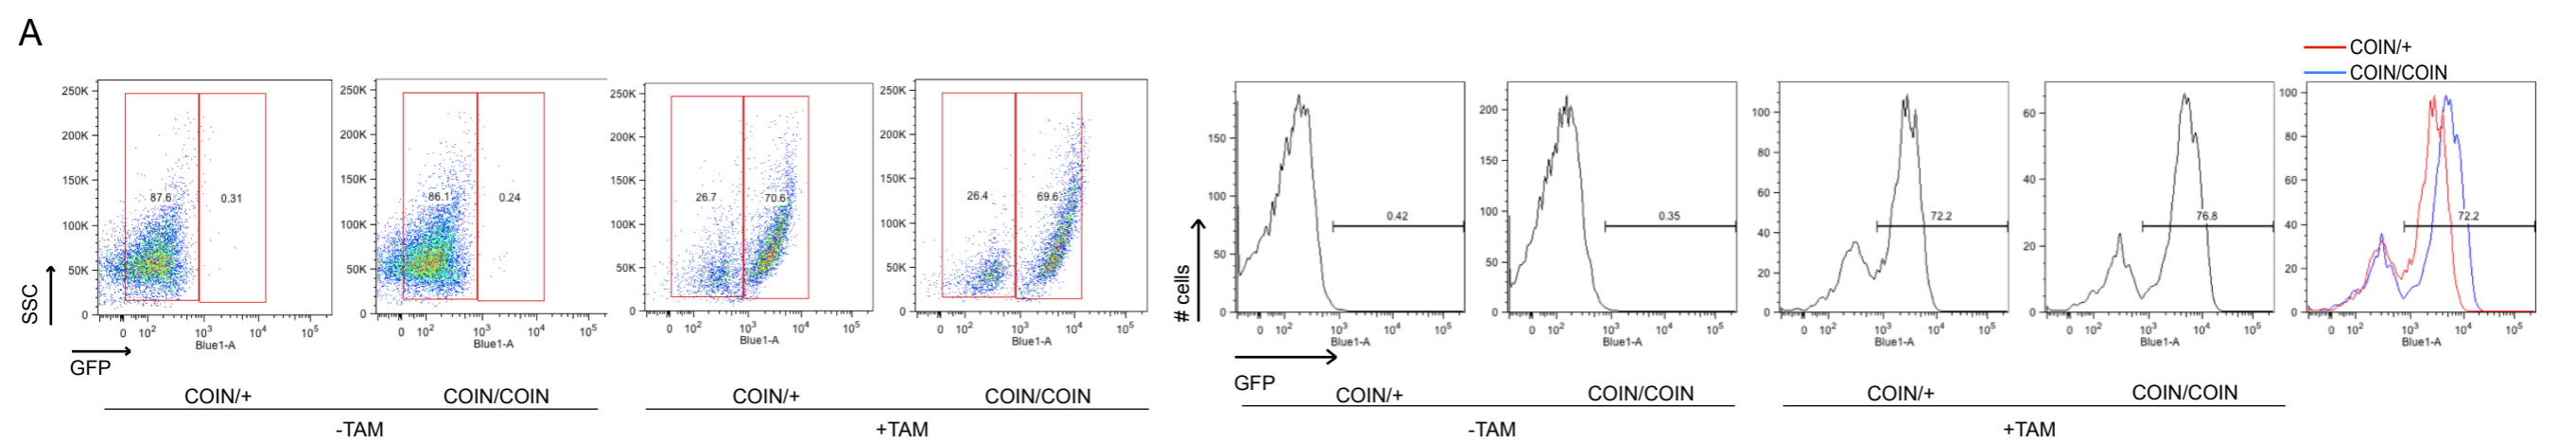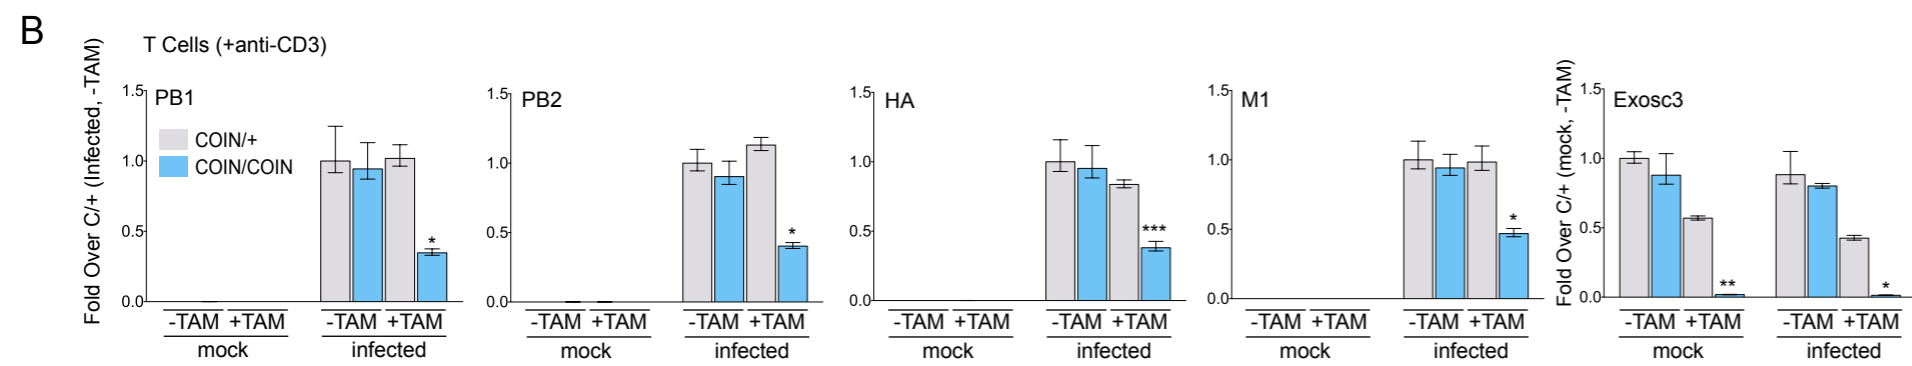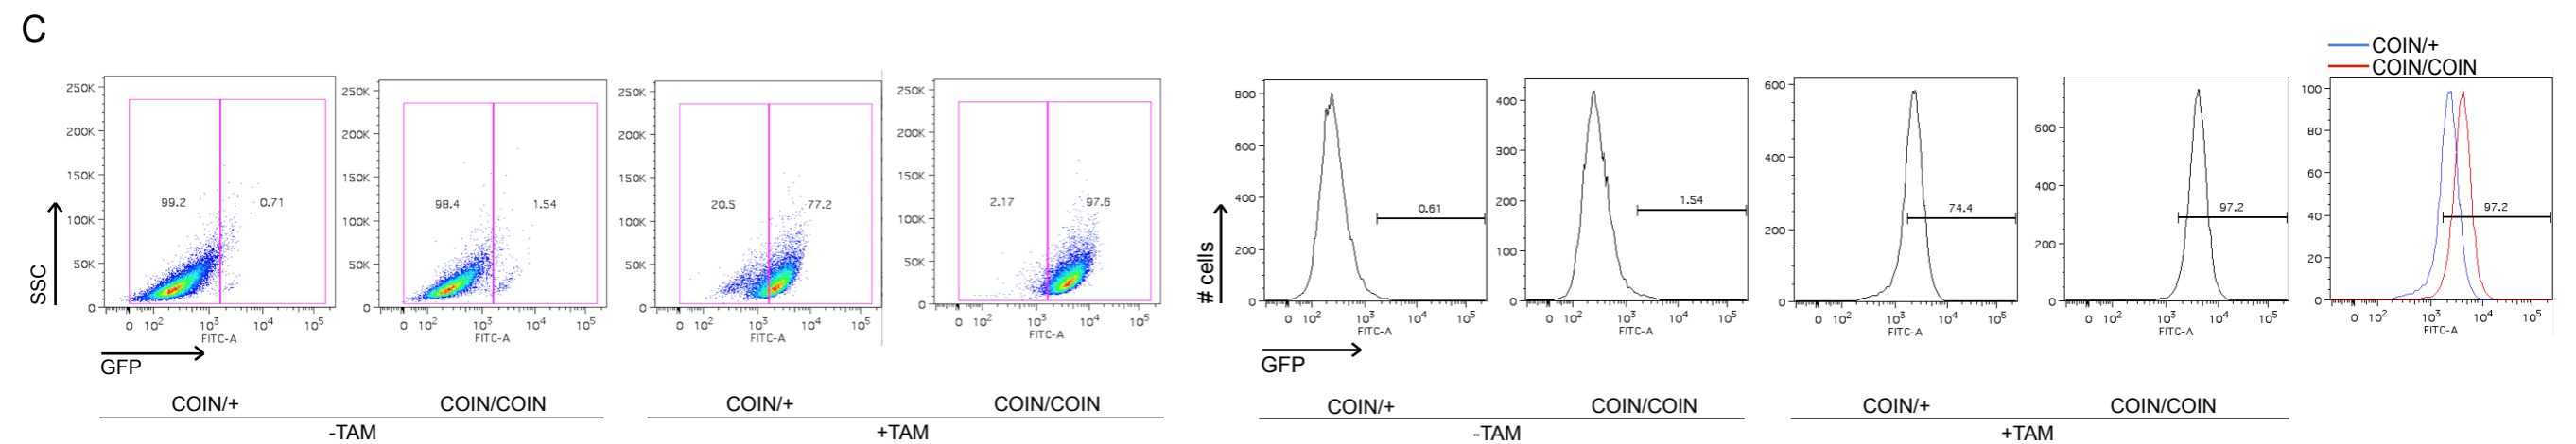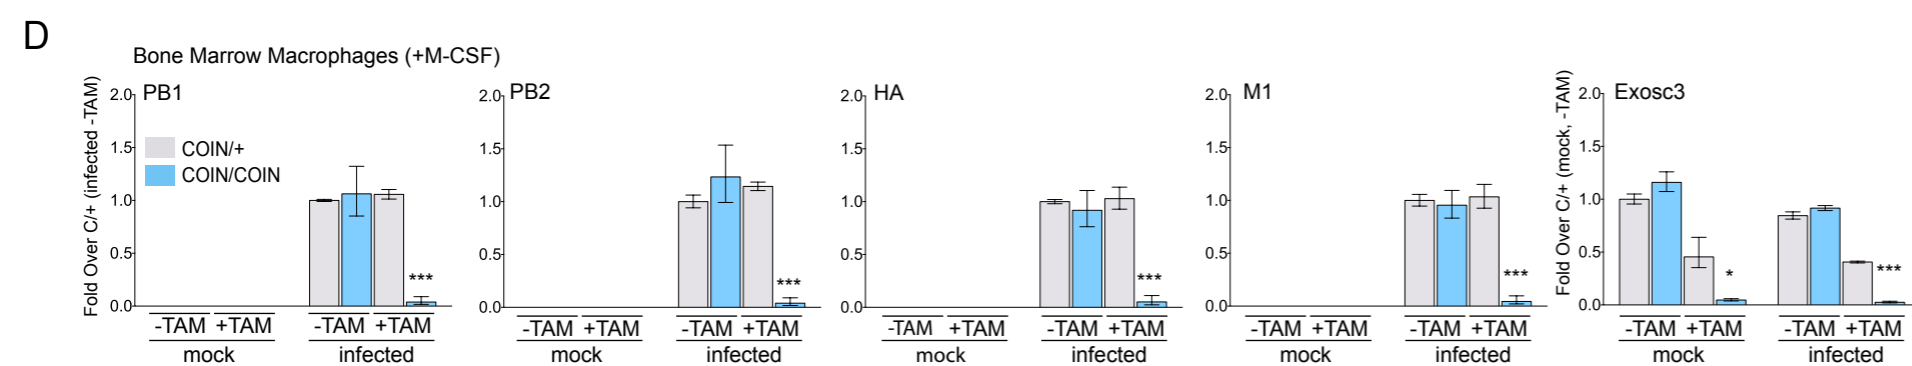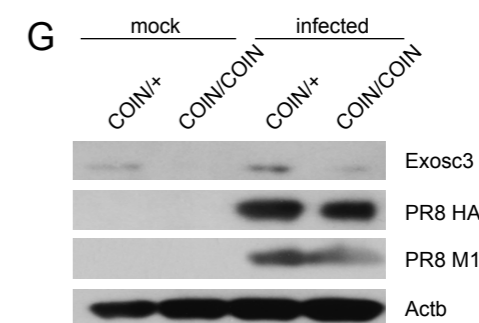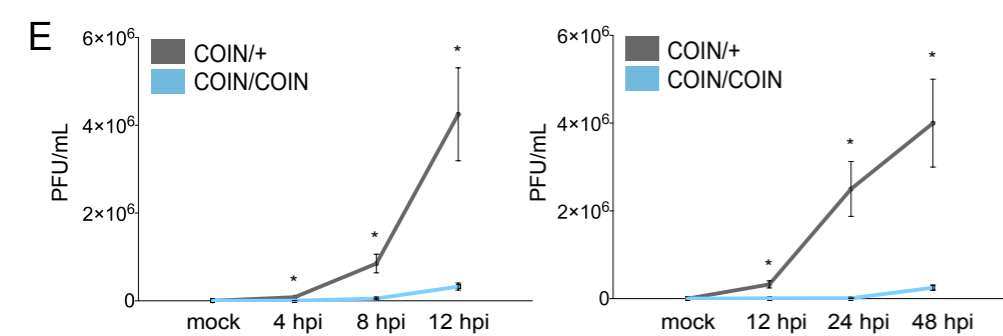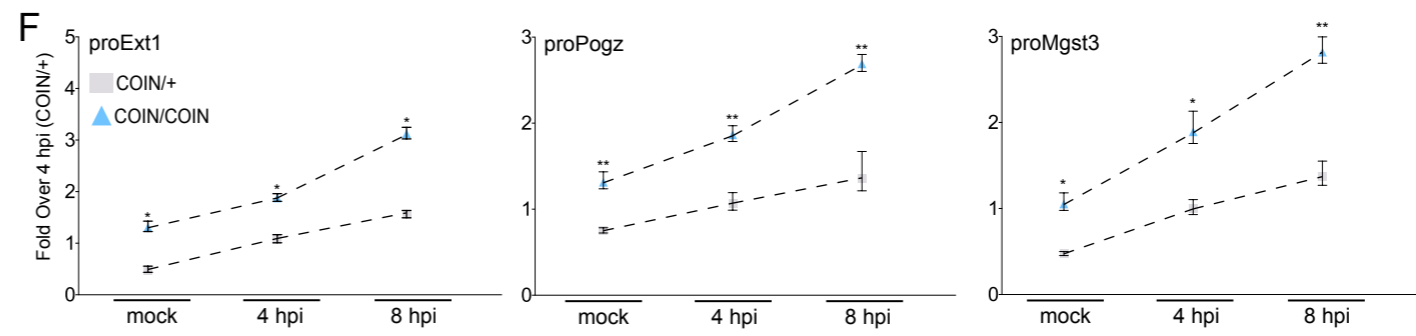

Supplement: NIHMS871396-supplement-4.pdf [file NIHMS871396-supplement-4.pdf]
